# Supplementary material
Source: Elsevier journal article supplement (https://www.sciencedirect.com/science/article/pii/S2173578621001542)
Supplement: mmc1 [file S2173578621001542:mmc1.docx]

| Supplementary Table 1 | | | | |
| --- | --- | --- | --- | --- |
| *Early complications* | | | | |
| Complication | Clavien-Dindo | ORP  122 (17,8%) | LRP  152 (22,2%) | RARP  390 (60,0%) |
| **Prolonged intense pain** | I | 1 (0,82%) | 0 | 1 (0,26%) |
| **Fever >38ºC** | I | 6 (4,92%) | 5 (3,29%) | 5 (1,28%) |
| **Wound infection** | I | 0 | 1 (0,66%) | 1 (0,26%) |
| **Acute urinary retention/Dislodgement of Foley catheter** | I | 0 | 2 (1,32%) | 3 (0,77%) |
| **Prolonged lymph secretion** | I | 0 | 0 | 2 (0,51%) |
| **Urinary leakage not requiring surgical intervention** | I | 1 (0,82%) | 2 (1,32%) | 8 (2,05%) |
| **Postoperative bleeding not requiring surgical intervention** | I | 1 (0,82%) | 2 (1,32%) | 7 (1,79%) |
| **Significant hematuria (± AUR or Toomey irrigation)** | I-II | 1 (0,82%) | 3 (1,97%) | 2 (0,51%) |
| **Acute coronary syndrome/Angina pectoris/Changes in ECG** | I-II | 1 (0,82%) | 2 (1,32%) | 5 (1,28%) |
| **Faecaloma** | II | 1 (0,82%) | 0 | 0 |
| **Paraphimosis** | II | 1 (0,82%) | 0 | 0 |
| **Vomits** | II | 1 (0,82%) | 0 | 0 |
| **Pressure sore** | II | 0 | 1 (0,66%) | 5 (1,28%) |
| **Allergic exanthema** | II | 0 | 0 | 2 (0,51%) |
| **Complicated UTI** | II | 1 (0,82%) | 1 (0,66%) | 3 (0,77%) |
| **Pneumonia** | II | 0 | 0 | 2 (0,51%) |
| **Ileus** | II | 3 (2,46%) | 0 | 4 (1,03%) |
| **Postoperative hypertension** | II | 0 | 0 | 1 (0,26%) |
| **Gout attack** | II | 0 | 0 | 1 (0,26%) |
| **Postoperative blood transfusion** | II | 24 (19,67%) | 7 (4,61%) | 17 (4,36%) |
| **Postoperative bleeding requiring surgical intervention** | III | 0 | 1 (0,66%) | 3 (0,77%) |
| **Urinary leakage requiring surgical intervention** | III | 1 (0,82%) | 1 (0,66%) | 1 (0,26%) |
| **Bowel injury + primary closure** | III | 0 | 1 (0,66%) | 1 (0,26%) |
| **Bowel injury + colostomy** | III | 1 (0,82%) | 2 (1,32%) | 0 |
| **Suture of drainage catheter (exploratory laparotomy/laparoscopy for removal)** | III | 0 | 2 (1,32%) | 0 |
| **Obturator nerve injury** | III | 0 | 0 | 1 (0,26%) |
| **Distal ureteral injury** | III | 0 | 0 | 1 (0,26%) |
| **Hydronephrosis + bilateral nephrostomies** | III | 0 | 1 (0,66%) | 0 |
| **Cardicac arrest** | IV | 1 (0,82%) | 0 | 0 |
| *AUR: Acute Urinary Retention; ECG: elecrocardiogram; UTI: Urinary Tract Infection* | | | | |

| Supplementary Table 2 | | | |
| --- | --- | --- | --- |
| *Late Complications* | | | |
| Complication | ORP  122 (17,8%) | LRP  152 (22,2%) | RARP  390 (60,0%) |
| **U-V anastomosis stenosis/sclerosis + TUI/TUR** | 3 (2,46%) | 6 (3,95%) | 12 (3,08%) |
| **Non-operated incisional hernia** | 3 (2,46%) | 4 (2,63%) | 12 (3,08%) |
| **Operated incisional hernia** | 3 (2,46%) | 0 | 18 (4,62%) |
| **Acute urinary retention** | 0 | 1 (0,66%) | 1 (0,26%) |
| **Lymphocele not requiring surgical intervention** | 0 | 1 (0,66%) | 1 (0,26%) |
| **Operated lymphocele** | 0 | 1 (0,66%) | 1 (0,26%) |
| **Urological sepsis** | 0 | 0 | 3 (0,77%) |
| **Carpal tunnel surgery** | 0 | 0 | 1 (0,26%) |
| **Male incontinence surgery** | 2 (1,64%) | 4 (2,63%) | 3 (0,77%) |
| **Penile prosthesis** | 2 (1,64%) | 0 | 1 (0,26%) |
| U-V: Urethro-Vesical; TUI/TUR: Trans-Urethral Incision/Resection | | | |

|  | Supplementary Table 3 | | | | |
| --- | --- | --- | --- | --- | --- |
|  | *Functional outcomes according to NVB conservation* | | | | |
| Features | Mean ± SD; Median (IQR) // n (%) | | | OR (95% CI); p | |
|  | ORP  122 (17,8%) | LRP  152 (22,2%) | RARP  390 (60,0%) | ORP vs RARP | LRP vs RARP |
| **NVB conservation (UI)**  None  Unilateral/Bilateral | 22 (20,6%)  85 (79,4%) | 82 (59,8%)  55 (40,2%) | 66 (16,9%)  324 (83,1%) | 1 (ref.); 0,39  0,83 (0,57-1,94) | 1 (ref.); <0,001  0,43 (0,29-0,76) |
| **Urinary incontinence**  No  Yes | 39 (45,9%)  46 (54,1%) | 23 (41,8%)  32 (58,2%) | 178 (54,9%)  146 (45,1%) | 1 (ref.); 0,14  0,73 (0,41-1,32) | 1 (ref.); 0,07  0,63 (0,29-1,11) |
| **IPSS** | 9,7 ± 7,1; 9,0 (4,0-13,0) | 10,3 ± 7,9; 9,0 (4,0-16,0) | 8,4 ± 6,2; 8,0 (3,0-13,0) | 0,98 (0,95-1,03); 0,09 | 0,98 (0,94-1,00); 0,04 |
| **IQL** | 2,3 ± 1,1; 2,0 (2,0-3,0) | 2,5 ± 1,5; 2,0 (1,0-3,0) | 2,0 ± 1,2; 2,0 (1,0-3,0) | 0,82 (0,68-0,98); 0,03 | 0,73 (0,63-0,94); 0,006 |
| **NVB conservation (ED)**  None  Unilateral/Bilateral | 16 (20,5%)  62 (79,5%) | 46 (51,1%)  44 (48,9%) | 41 (13,4%)  266 (86,6%) | 1 (ref.); 0,12  0,67 (0,36-1,21) | 1 (ref.); <0,001  0,47 (0,34-0,82) |
| **Erectile dysfunction**  No  Yes | 11 (17,7%)  51 (82,3%) | 13 (29,5%)  31 (70,5%) | 92 (34,6%)  174 (65,4%) | 1 (ref.); 0,009  0,51 (0,37-0,91) | 1 (ref.); 0,52  0,88 (0,61-2,37) |
